# Supplementary material for: Synthesis and X-ray Structure Analysis of the Polymeric [Ag2(4-Amino-4H-1,2,4-triazole)2(NO3)]n(NO3)n Adduct: Anticancer, and Antimicrobial Applications
Source: MDPI journal article supplement (doi:10.3390/inorganics11100395), 2023-10-09
Supplement: s1 [file s1]

# Synthesis and X-ray Structure Analysis of the Polymeric $[\text{Ag}_2(4\text{-Amino-4H-1,2,4-triazole})_2(\text{NO}_3)]_n(\text{NO}_3)_n$ Adduct: Anticancer, and Antimicrobial Applications

Mostafa A. El-Naggar <sup>1,\*</sup>, Hessa H. Al-Rasheed <sup>2,\*</sup>, Sarah A. AL-khamis <sup>2</sup>,  
Ayman El-Faham <sup>1</sup>, Morsy A. M. Abu-Youssef <sup>1</sup>, Matti Haukka <sup>3</sup>, Assem Barakat <sup>2</sup>,  
Mona M. Sharaf <sup>4</sup> and Saied M. Soliman <sup>1,\*</sup>

- <sup>1</sup> Department of Chemistry, Faculty of Science, Alexandria University,  
P.O. Box 426, Ibrahimia, Alexandria 21321, Egypt;  
ayman.elfaham@alexu.edu.eg (A.E.-F.); morsy5@alexu.edu.eg (M.A.M.A.-Y.)
- <sup>2</sup> Department of Chemistry, College of Science, King Saud University,  
P.O. Box 2455, Riyadh 11451, Saudi Arabia;  
441203438@student.ksu.edu.sa (S.A.A.-k.); ambarakat@ksu.edu.sa (A.B.)
- <sup>3</sup> Department of Chemistry, University of Jyväskylä, P.O. Box 35,  
FI-40014 Jyväskylä, Finland; matti.o.haukka@jyu.fi
- <sup>4</sup> Protein Research Department, Genetic Engineering and Biotechnology  
Research Institute, City of Scientific Research and Technological  
Applications, Alexandria P.O. Box 21933, Egypt
- \* Correspondence: mostafa.elnaggar@alexu.edu.eg (M.A.E.-N.);  
halbahli@ksu.edu.sa (H.H.A.-R.); saied1soliman@yahoo.com (S.M.S.)

### Crystal structure analysis

A crystal of  $[\text{Ag}_2(\text{L})_2(\text{NO}_3)]_n(\text{NO}_3)_n$  was immersed in cryo-oil, mounted in a loop, and measured at a temperature of 120 K. The X-ray diffraction data were collected on a Rigaku Oxford Diffraction Supernova diffractometer using  $\text{MoK}\alpha$  radiation. The *CrysAlisPro* [68] software package was used for cell refinement and data reduction. A Gaussian absorption correction (*CrysAlisPro* was applied to the intensities before the structure solution [68]). The structure was solved by the intrinsic phasing (*SHELXT*) method [69]. Structural refinement was carried out using *SHELXL* [70] software with *SHELXLE* [71] graphical user interface. The  $\text{NH}_2$  hydrogen atoms were located from the difference Fourier map and refined isotropically. Other hydrogen atoms were positioned geometrically and constrained to ride on their parent atoms, with  $\text{C-H} = 0.95 \text{ \AA}$  and  $U_{\text{iso}} = 1.2 \cdot U_{\text{eq}}(\text{parent atom})$ . The crystallographic details are summarized in Table S1, Supplementary data.

**Table S1:** Crystallographic details and crystal refinement parameters for the complex  $[\text{Ag}_2(\text{L})_2(\text{NO}_3)]_n(\text{NO}_3)_n$ .

|                                          | $[\text{Ag}_2(\text{L})_2(\text{NO}_3)]_n(\text{NO}_3)_n$ |
|------------------------------------------|-----------------------------------------------------------|
| CCDC                                     | 2293611                                                   |
| empirical formula                        | $\text{C}_4\text{H}_8\text{Ag}_2\text{N}_{10}\text{O}_6$  |
| fw                                       | 507.94                                                    |
| temp (K)                                 | 120(2)                                                    |
| $\lambda(\text{\AA})$                    | 0.71073                                                   |
| cryst syst                               | Orthorhombic                                              |
| space group                              | Pccn                                                      |
| $a(\text{\AA})$                          | 6.97690(10)                                               |
| $b(\text{\AA})$                          | 12.90670(10)                                              |
| $c(\text{\AA})$                          | 27.7850(2)                                                |
| $V(\text{\AA}^3)$                        | 2502.00(4)                                                |
| $Z$                                      | 8                                                         |
| $\rho_{\text{calc}}(\text{Mg/m}^3)$      | 2.697                                                     |
| $\mu(\text{Mo K}\alpha)(\text{mm}^{-1})$ | 3.185                                                     |
| No. reflns.                              | 83720                                                     |
| Unique reflns.                           | 6412                                                      |
| Completeness to $\theta=25.242^\circ$    | 99.5%                                                     |
| GOOF ( $F^2$ )                           | 1.165                                                     |
| $R_{\text{int}}$                         | 0.0280                                                    |
| $R1^a(I \geq 2\sigma)$                   | 0.0186                                                    |
| $wR2^b(I \geq 2\sigma)$                  | 0.0403                                                    |

$$^a R1 = \sum ||F_o| - |F_c|| / \sum |F_o|, \quad ^b wR2 = \{\sum [w(F_o^2 - F_c^2)^2] / \sum [w(F_o^2)^2]\}^{1/2}$$

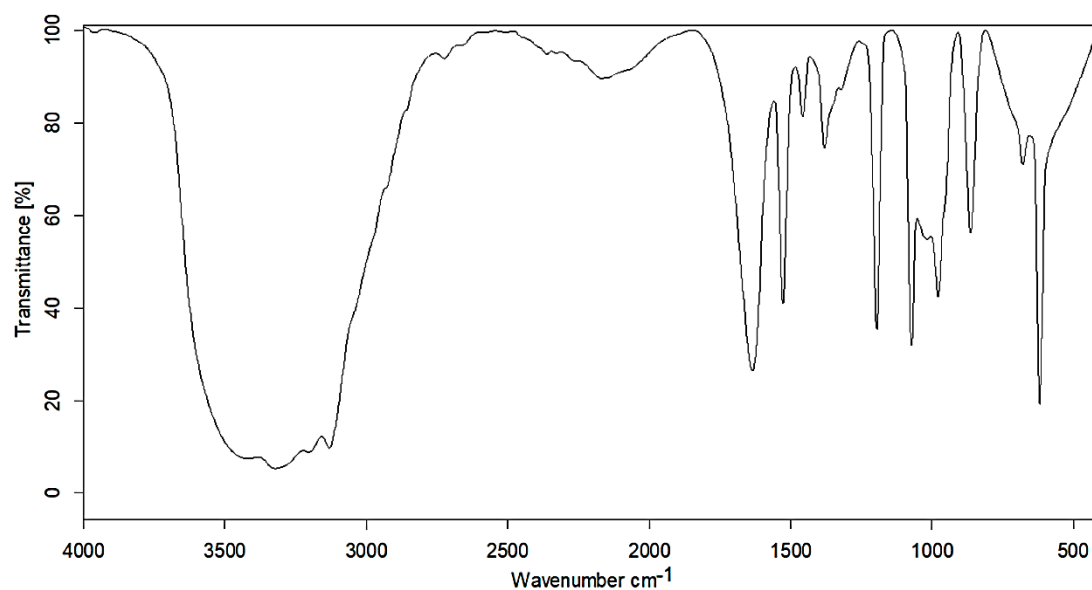

Figure S1: FTIR spectrum of the free ligand.

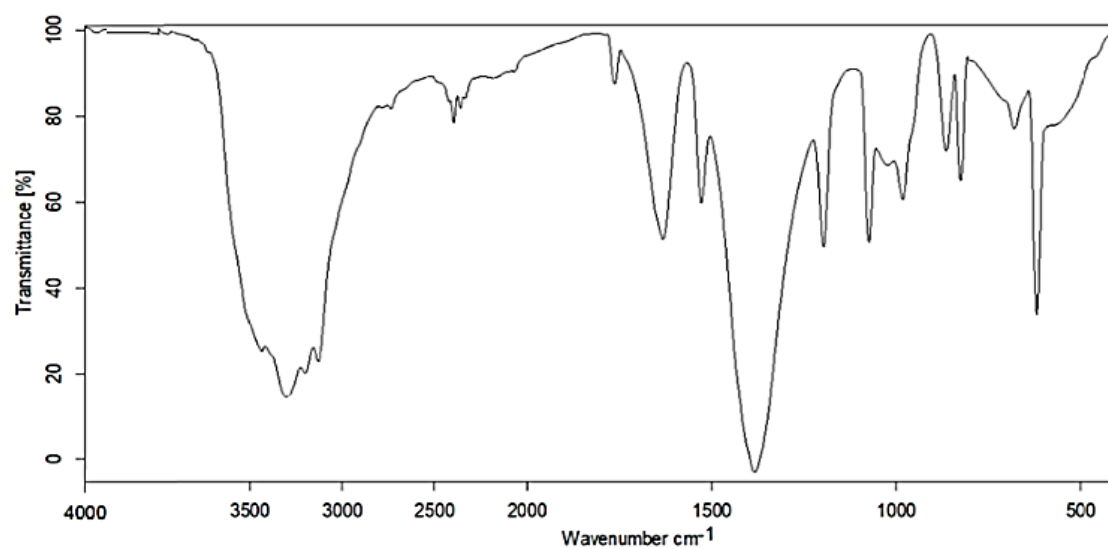

Figure S2: FTIR spectrum of the complex;  $[\text{Ag}_2(\text{L})_2(\text{NO}_3)]_n(\text{NO}_3)_n$ .

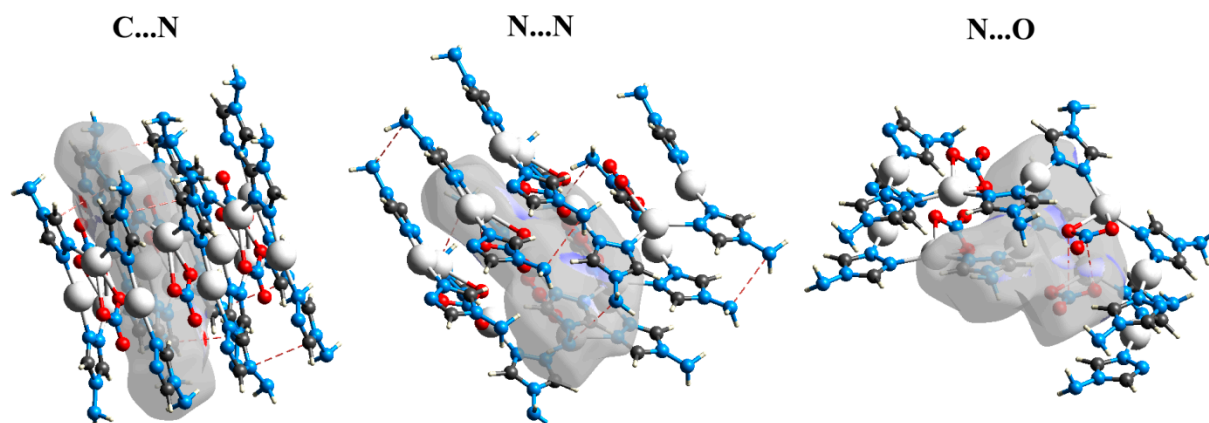

**Figure S3.**  $d_{\text{norm}}$  maps of C...N, N...N, and N...O contacts. The C...N contacts occur between the parallel triazole rings, N...N interactions occurred between amino groups while N...O contacts occur between the nitrate groups.

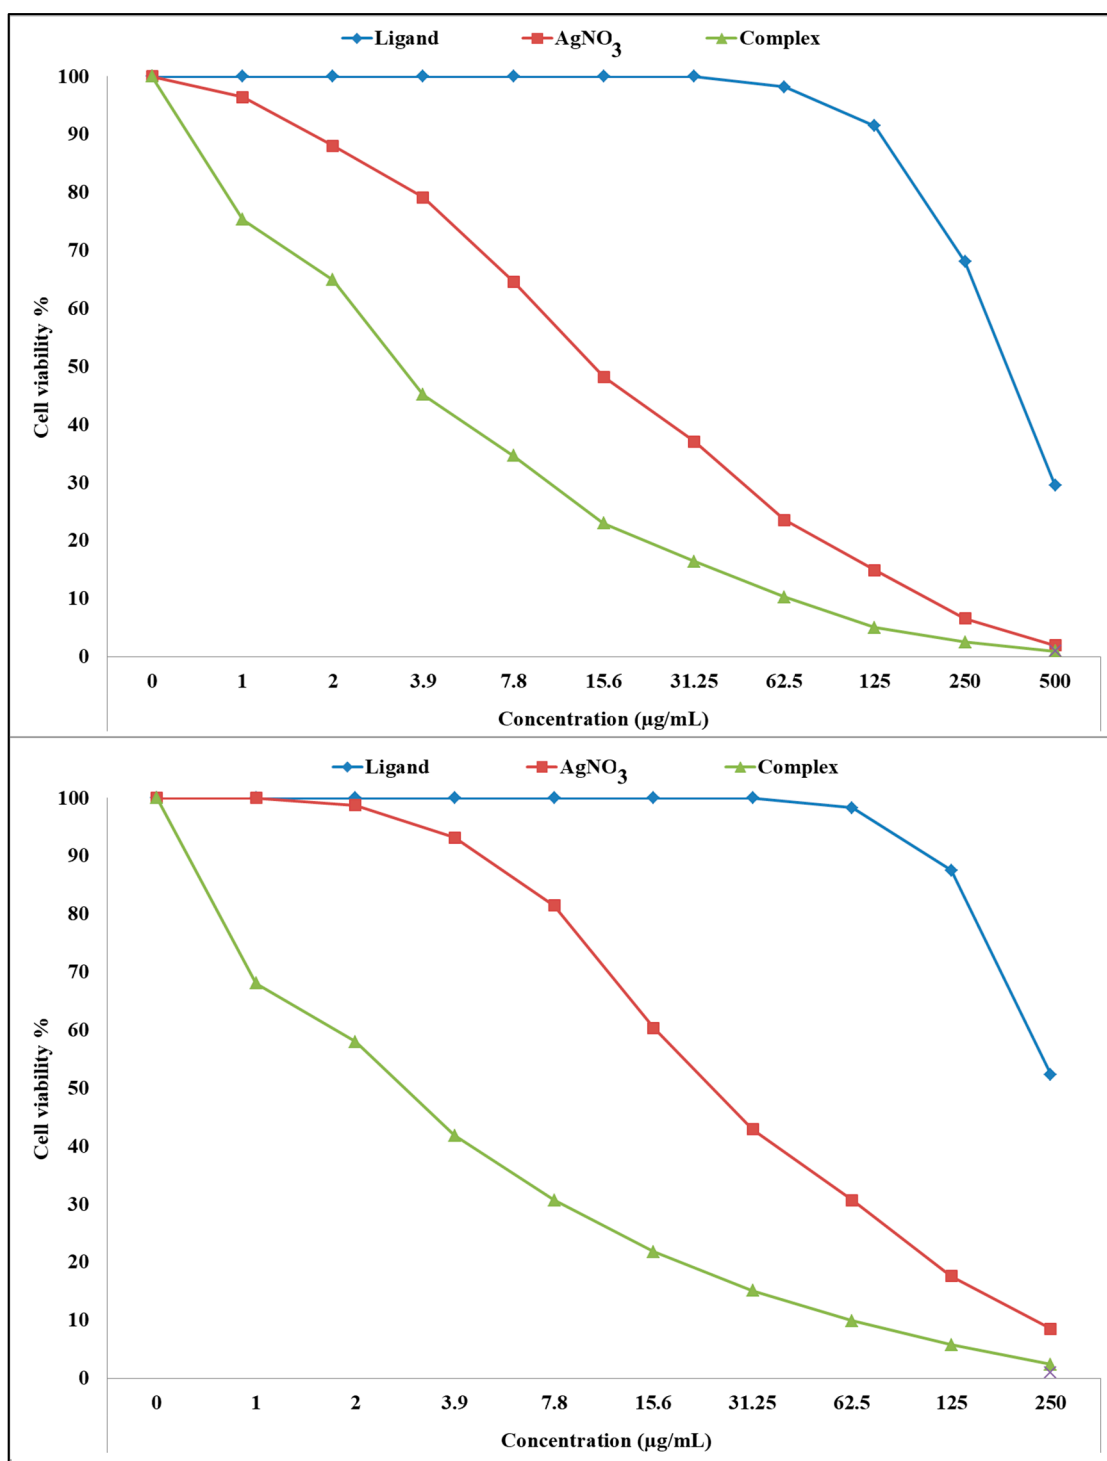

**Figure S4.** The anticancer action of the studied complex, free ligand and AgNO<sub>3</sub> against A-549 lung (upper) and MCF-7 breast (lower) carcinoma cells lines.

**Table S2:** Evaluation of cytotoxicity against A-549 cell line for the free ligand.

| Sample conc. (µg/ml) | Viability % | Inhibitory % | S.D. (±) |
|----------------------|-------------|--------------|----------|
| 500                  | 29.47       | 70.53        | 1.29     |
| 250                  | 68.06       | 31.94        | 1.82     |
| 125                  | 91.43       | 8.57         | 0.65     |
| 62.5                 | 98.16       | 1.84         | 0.28     |
| 31.25                | 100         | 0            |          |
| 15.6                 | 100         | 0            |          |
| 7.8                  | 100         | 0            |          |
| 3.9                  | 100         | 0            |          |
| 2                    | 100         | 0            |          |
| 1                    | 100         | 0            |          |
| 0.5                  | 100         | 0            |          |
| 0.25                 | 100         | 0            |          |
| 0                    | 100         | 0            |          |

**IC<sub>50</sub> = 366.99 ± 13.94 µg/mL.**

**Table S3:** Evaluation of cytotoxicity against A-549 cell line for the complex [Ag<sub>2</sub>(L)<sub>2</sub>(NO<sub>3</sub>)<sub>4</sub>].

| Sample conc. (µg/ml) | Viability % | Inhibitory % | S.D. (±) |
|----------------------|-------------|--------------|----------|
| 500                  | 0.92        | 99.08        | 0.23     |
| 250                  | 2.45        | 97.55        | 0.19     |
| 125                  | 4.98        | 95.02        | 0.43     |
| 62.5                 | 10.27       | 89.73        | 0.15     |
| 31.25                | 16.36       | 83.64        | 0.28     |
| 15.6                 | 22.94       | 77.06        | 0.72     |
| 7.8                  | 34.59       | 65.41        | 1.07     |
| 3.9                  | 45.12       | 54.88        | 1.44     |
| 2                    | 64.91       | 35.09        | 1.35     |
| 1                    | 75.32       | 24.68        | 0.64     |
| 0.5                  | 82.40       | 17.6         | 0.38     |
| 0.25                 | 90.63       | 9.37         | 0.19     |
| 0                    | 100         | 0            |          |

**IC<sub>50</sub> = 3.50 ± 0.37 µg/mL**

**Table S4:** Evaluation of cytotoxicity against MCF-7 cell line for the free ligand..

| Sample conc. (µg/ml) | Viability % | Inhibitory % | S.D. (±) |
|----------------------|-------------|--------------|----------|
| 500                  | 23.65       | 76.35        | 2.17     |
| 250                  | 52.34       | 47.66        | 1.82     |
| 125                  | 87.51       | 12.49        | 0.63     |
| 62.5                 | 98.27       | 1.73         | 0.19     |
| 31.25                | 100         | 0            |          |
| 15.6                 | 100         | 0            |          |
| 7.8                  | 100         | 0            |          |
| 3.9                  | 100         | 0            |          |
| 2                    | 100         | 0            |          |
| 1                    | 100         | 0            |          |
| 0.5                  | 100         | 0            |          |
| 0.25                 | 100         | 0            |          |
| 0                    | 100         | 0            |          |

**IC<sub>50</sub> = 270.39 ± 11.86 µg/mL**

**Table S5:** Evaluation of cytotoxicity against MCF-7 cell line for [Ag<sub>2</sub>(L)<sub>2</sub>(NO<sub>3</sub>)<sub>n</sub> (NO<sub>3</sub>)<sub>n</sub>.

| Sample conc. (µg/ml) | Viability % | Inhibitory % | S.D. (±) |
|----------------------|-------------|--------------|----------|
| 500                  | 0.79        | 99.21        | 0.13     |
| 250                  | 2.34        | 97.66        | 0.08     |
| 125                  | 5.72        | 94.28        | 0.06     |
| 62.5                 | 9.85        | 90.15        | 0.07     |
| 31.25                | 15.08       | 84.92        | 0.14     |
| 15.6                 | 21.75       | 78.25        | 0.39     |
| 7.8                  | 30.64       | 69.36        | 0.42     |
| 3.9                  | 41.83       | 58.17        | 0.75     |
| 2                    | 57.94       | 42.06        | 1.28     |
| 1                    | 68.03       | 31.97        | 0.71     |
| 0.5                  | 76.18       | 23.82        | 0.35     |
| 0.25                 | 84.92       | 15.08        | 0.44     |
| 0                    | 100         | 0            |          |

**IC<sub>50</sub> = 2.98 ± 0.26 µg/mL**

Table S6. Inhibition zone diameters (mm) for  $[\text{Ag}_2(\text{L})_2(\text{NO}_3)]_n(\text{NO}_3)_n$ , free L,  $\text{AgNO}_3$ , and positive controls.<sup>a</sup>

| Compound                                                  | Gram-Positive Bacteria |                    | Gram-Negative Bacteria |                    | Fungi               |                    |
|-----------------------------------------------------------|------------------------|--------------------|------------------------|--------------------|---------------------|--------------------|
|                                                           | <i>St. aureus</i>      | <i>B. subtilis</i> | <i>E. coli</i>         | <i>P. vulgaris</i> | <i>A. fumigatus</i> | <i>C. albicans</i> |
| $[\text{Ag}_2(\text{L})_2(\text{NO}_3)]_n(\text{NO}_3)_n$ | 15                     | 13                 | 16                     | 15                 | NA                  | 14                 |
| $\text{AgNO}_3$                                           | 14                     | 13                 | 15                     | 20                 | NA                  | 10                 |
| L                                                         | NA                     | NA                 | NA                     | NA                 | NA                  | NA                 |
| Control                                                   | 24 <sup>a</sup>        | 26 <sup>a</sup>    | 30 <sup>a</sup>        | 25 <sup>a</sup>    | 17 <sup>b</sup>     | 20 <sup>b</sup>    |

<sup>a</sup> Gentamycin; <sup>b</sup> Ketoconazole; ND: Not determined; NA: No activity



### **Method S1:**

Evaluation of Cytotoxic Effects against the human lung (A-549) and breast (MCF-7) cancer cell lines.

Mammalian cell line A-549 (human Lung Carcinoma) and MCF-7 (human Breast Carcinoma) cells were obtained from the American Type Culture Collection (ATCC, Rockville, MD). Dimethyl sulfoxide (DMSO), MTT and trypan blue dye was purchased from Sigma (St. Louis, Mo., USA). Fetal Bovine serum, RPMI-1640, HEPES buffer solution, L-glutamine, gentamycin and 0.25% Trypsin-EDTA were purchased from Lonza (Belgium).

### **Cell line Propagation:**

The cells were grown on RPMI-1640 medium supplemented with 10% inactivated fetal calf serum and 50µg/mL Gentamycin. The cells were maintained at 37°C in a humidified atmosphere with 5% CO<sub>2</sub> and were subcultured two to three times a week.

### **Cytotoxicity evaluation using viability assay:**

For antitumor assays, the tumor cell lines were suspended in medium at concentration  $5 \times 10^4$  cell/well in Corning® 96-well tissue culture plates, then incubated for 24 hr. The tested compounds were then added into 96-well plates (three replicates) to achieve twelve concentrations for each compound. Six vehicle controls with media or 0.5 % DMSO were run for each 96 well plate as a control. After incubating for 24 h, the numbers of viable cells were determined by the MTT test. Briefly, the media was removed from the 96 well plates and replaced with 100 µL of fresh culture RPMI 1640 medium without phenol red then 10 µL of the 12 mM MTT stock solution (5 mg of MTT in 1 mL of PBS) to each well including the untreated controls. The 96 well plates were then incubated at 37°C and 5% CO<sub>2</sub> for 4 hours. An 85 µL aliquot of the media was removed from the wells, and 50 µL of DMSO was added to each well and mixed thoroughly with the pipette and incubated at 37°C for 10 min. Then, the optical density was measured at 590 nm with the microplate reader (SunRise, TECAN, Inc, USA) to determine the number of viable cells and the percentage of viability was calculated as  $[(OD_t/OD_c)] \times 100\%$  where OD<sub>t</sub> is the mean optical density of wells treated with the tested sample and OD<sub>c</sub> is the mean optical density of untreated cells. The relation between surviving cells and drug concentration is plotted to get the survival curve of each tumor cell line after treatment with the specified compound. The 50% inhibitory concentration (IC<sub>50</sub>), the concentration required to cause toxic effects in 50% of intact cells, was estimated from graphic plots of the dose response curve for each conc. using Graphpad Prism software (San Diego, CA. USA).

## **Method S2:**

### **Testing of Antimicrobial Activity**

“The antimicrobial activities of the studied Ag(I) complex were determined according to the recommendations of NCCLS4038 by the use of the broth microdilution method. Minimum inhibitory concentrations (MICs) for the tested compounds were conducted using *Staphylococcus aureus* (ATCC 25923) and *Bacillus subtilis* (RCMB 015 (1) NRRL B-543) as Gram-positive bacteria; *Escherichia coli* (ATCC 25922) and *Proteus vulgaris* (RCMB 004 (1) ATCC 13315) as Gram negative bacteria, and two yeasts, *Aspergillus fumigatus* (RCMB 002008) and *Candida albicans* (RCMB 005003 (1) ATCC 10231). The tested compounds were dissolved in DMSO to give a stock solution that was subsequently diluted in the growth medium to give 1.5 serial dilutions from 256–0.5 µg/mL medium. To ensure full solubility of the tested materials, 5% DMSO was present in all bioassay media, a concentration which had no antibacterial effect on its own. Bacteria were cultured in Mueller Hinton Broth (MHB) for 24 h at 35 °C with 105 CFU/mL culture filtrate. MIC values correspond to the lowest concentration that inhibited the bacterial growth.

In case of inhibition zone determination, 100 µl of the test bacteria/fungi were grown in 10 mL of fresh media until they reached a count of approximately 108 cells/ml for bacteria or 105 cells/mL for fungi. One hundred µl of microbial suspension was spread onto agar plates corresponding to the broth in which they were maintained and tested for susceptibility by well diffusion method. One hundred µL of each sample (at 10 mg/ml) was added to each well (6 mm diameter holes cut in the agar gel). The plates were incubated for 24–48 h at 37 °C (for bacteria and yeast) and for 48 h at 28 °C (for filamentous fungi). After incubation, the microorganism's growth was observed. The resulting inhibition zone diameters were measured in millimeters and used as criterion for the antimicrobial activity. If an organism is placed on the agar it will not grow in the area around the well if it is susceptible to the chemical. This area of no growth around the disc is known as a "Zone of inhibition" or "Clear zone". The size of the clear zone is proportional to the inhibitory action of the compound under investigation. Solvent controls (DMSO) were included in every experiment as negative controls. DMSO was used for dissolving the tested compounds and showed no inhibition zones, confirming that it has no influence on growth of the tested microorganisms. Positive controls were also performed using gentamycin as standard antibacterial drugs and ketoconazole as standard antifungal drug.

[68] Rigaku Oxford Diffraction. *CrysAlisPro*; Agilent Technologies Inc.: Oxfordshire, UK, 2020.

[69] Sheldrick, G.M. Shelxt-integrated space-group and crystal-structure determination. *Acta Cryst.* **2015**, *A71*, 3–8.

[70] Sheldrick, G.M. Crystal structure refinement with *SHELXL*. *Acta Cryst.* **2015**, *C71*, 3–8.

[71] Hübschle, C.B.; Sheldrick, G.M.; Dittrich, B. ShelXle: A Qt graphical user interface for SHELXL. *J. Appl. Cryst.* **2011**, *44*, 1281–1284.
